# Supplementary material
Source: Springer Nature journal article supplement (https://www.springermedizin.de/resource/supplementary/13063_2012_1093_MOESM1_ESM.pdf/9619340)

## DQIP

## Evaluation

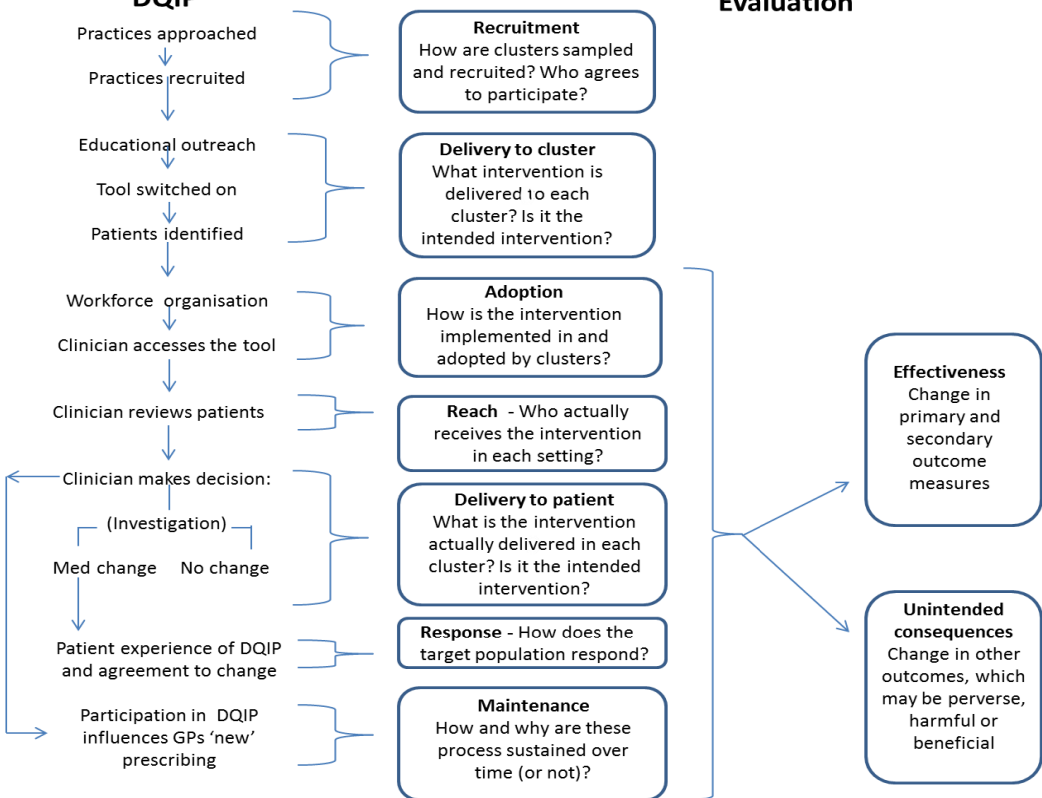

Supplement: MOESM1 [file 9619340]
